# Supplementary material
Source: Springer Nature journal article supplement (https://www.springermedizin.de/resource/supplementary/12891_2013_2320_MOESM4_ESM.pdf/9509826)

Protocol for Treatment of Displaced Proximal Humeral fractures: The **DELPHI** trial

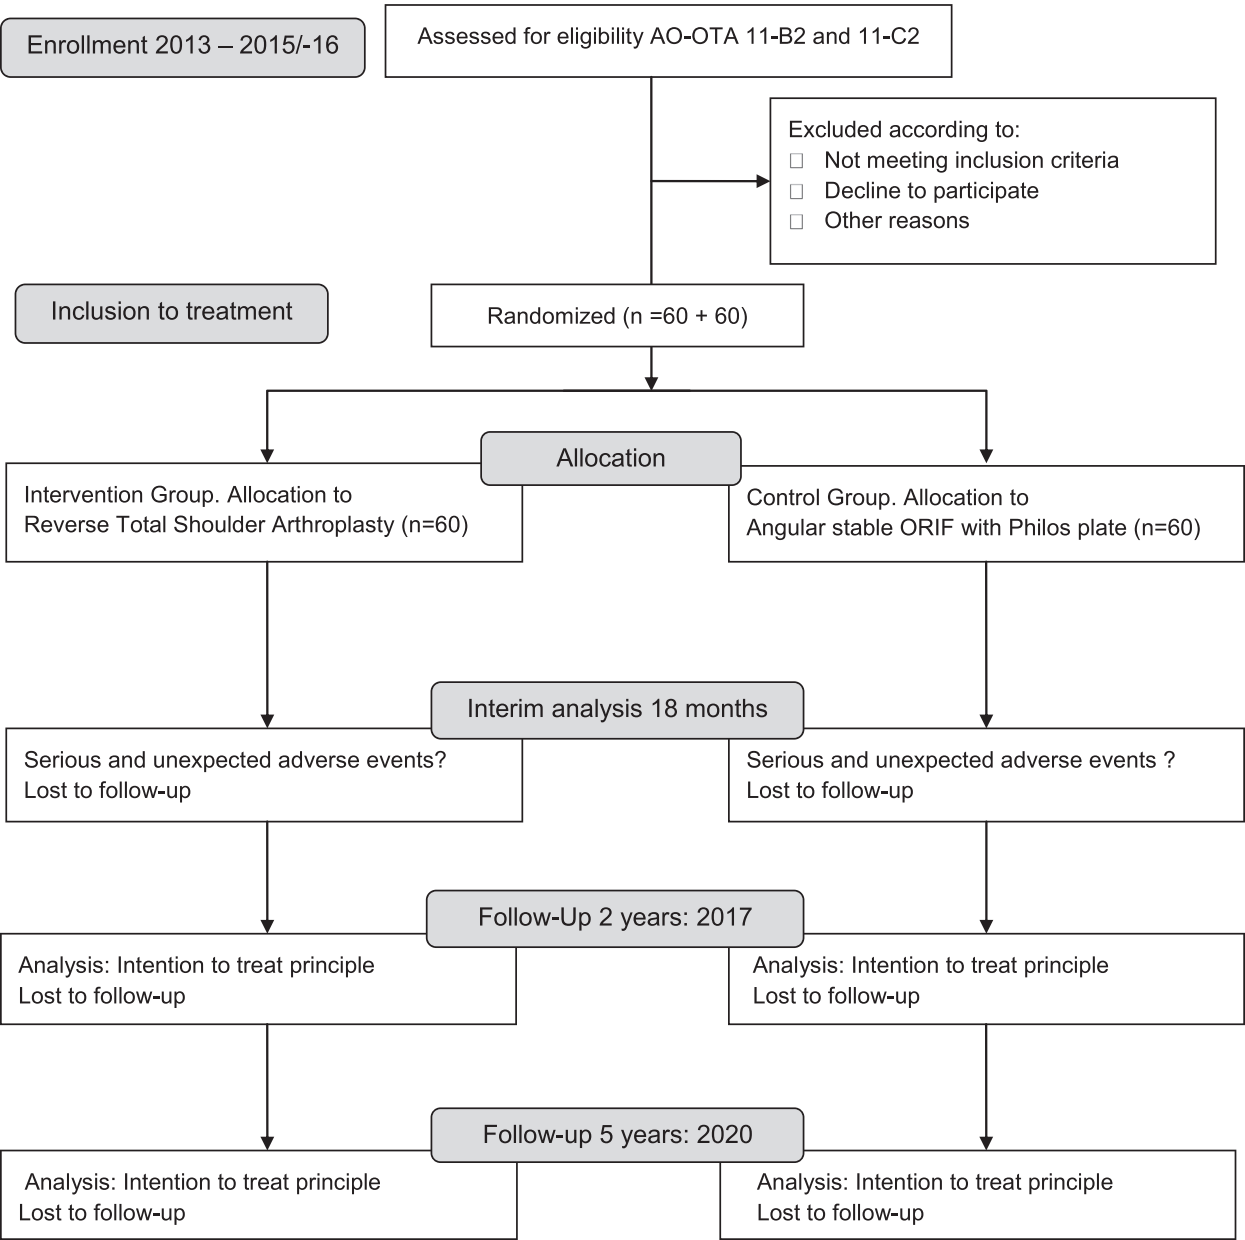

Supplement: MOESM4 [file 9509826]
